# Supplementary material for: A blood-based metabolomic signature predictive of risk for pancreatic cancer
Source: PubMed Central journal article supplement — Cell Rep Med. 2023 Sep 19;4(9):101194. doi: 10.1016/j.xcrm.2023.101194 (PMC10518621; doi:10.1016/j.xcrm.2023.101194), 2023-09-19
Supplement: mmc1.pdf [file mmc1.pdf]

**Cell Reports Medicine, Volume 4**

## **Supplemental information**

### **A blood-based metabolomic signature predictive of risk for pancreatic cancer**

**Ehsan Irajizad, Ana Kenney, Tiffany Tang, Jody Vykoukal, Ranran Wu, Eunice Murage, Jennifer B. Dennison, Marta Sans, James P. Long, Maureen Loftus, John A. Chabot, Michael D. Kluger, Fay Kastrinos, Lauren Brais, Ana Babic, Kunal Jajoo, Linda S. Lee, Thomas E. Clancy, Kimmie Ng, Andrea Bullock, Jeanine M. Genkinger, Anirban Maitra, Kim-Anh Do, Bin Yu, Brian M. Wolpin, Sam Hanash, and Johannes F. Fahrman**

## Contents

|                                                                                                                                                                                                                            |    |
|----------------------------------------------------------------------------------------------------------------------------------------------------------------------------------------------------------------------------|----|
| <b>Supplementary Table S1 (related to Table 3).</b> Patient characteristics for the PLCO Development Set and the set-aside Test Set. ....                                                                                  | 3  |
| <b>Supplementary Table S2 (related to Table 2).</b> Selected microbial-associated metabolites and corresponding model coefficients in LASSO regression. ....                                                               | 4  |
| <b>Supplementary Table S3 (related to Table 2).</b> Stability check of the LASSO regression using perturbed training data and evaluated on the Validation Set for the 3-marker microbial panel. ....                       | 5  |
| <b>Supplementary Table S5 (related to Table 3).</b> Patient and tumor characteristics for the newly-diagnosed PDAC cohort. ....                                                                                            | 7  |
| <b>Supplementary Table S6 (related to Figure 2).</b> Performance of all non-microbial metabolites in the PLCO Training and Validation Sets. ....                                                                           | 9  |
| <b>Supplementary Table S7 (related to Table 3).</b> Selected non-microbial metabolites. .                                                                                                                                  | 10 |
| <b>Supplementary Table S9 (related to Table 3).</b> Performance of the 5-marker non-microbial panel in the PLCO set-aside Test Set and the entire specimen set. ....                                                       | 12 |
| <b>Supplementary Table S10 (related to Figure 2 and Table 4).</b> Performance of the combined metabolite panel plus CA19-9 stratified by diabetic status. ....                                                             | 13 |
| <b>Supplementary Figure S1 (related to Figure 1 and Table 2).</b> Distribution plots for detected microbial-related metabolites across analytical batches in the PLCO specimen set. ....                                   | 14 |
| <b>Supplementary Figure S2 (related to Figure 1 and Table 2).</b> Odds ratios, adjusted odds ratios, and correlations for individual microbial-related metabolites for risk of pancreatic cancer in the Training Set. .... | 15 |

**Supplementary Figure S3 (related to Table 2).** Workflow of analyses..... 16

**Supplementary Figure S4 (related to Table 3).** Predictive performance of the 3-marker microbial panel in the independent newly-diagnosed PDAC cohort. .... 17

**Supplementary Table S1 (related to Table 3). Patient characteristics for the PLCO Development Set and the set-aside Test Set.**

|                                    | Development Set |         |                |         | Set-Aside Test Set |         |
|------------------------------------|-----------------|---------|----------------|---------|--------------------|---------|
|                                    | Training Set    |         | Validation Set |         | Set-Aside Test Set |         |
|                                    | Non-cases       | Cases   | Non-cases      | Cases   | Non-cases          | Cases   |
| <b>Total</b>                       | 494             | 102     | 142            | 33      | 225                | 37      |
| <b>Gender, N (%)</b>               |                 |         |                |         |                    |         |
| Female                             | 204 (41)        | 41 (40) | 61 (43)        | 17 (52) | 91 (40)            | 13 (35) |
| Male                               | 290 (59)        | 61 (60) | 81 (57)        | 16 (48) | 134 (60)           | 24 (65) |
| <b>Age At Randomization, N (%)</b> |                 |         |                |         |                    |         |
| <= 59                              | 116 (23)        | 21 (21) | 22 (15)        | 11 (33) | 45 (20)            | 5 (14)  |
| 60-64                              | 108 (22)        | 24 (24) | 34 (24)        | 3 (9)   | 63 (28)            | 14 (38) |
| 65-69                              | 192 (39)        | 41 (40) | 50 (35)        | 9 (27)  | 79 (35)            | 13 (35) |
| >= 70                              | 78 (16)         | 16 (16) | 36 (25)        | 10 (30) | 38 (17)            | 5 (14)  |
| <b>Race, N (%)</b>                 |                 |         |                |         |                    |         |
| White                              | 463 (94)        | 99 (97) | 107 (75)       | 24 (73) | 211 (94)           | 33 (89) |
| Black                              | 22 (4)          | 3 (3)   | 2 (1)          | 1 (3)   | 6 (3)              | 2 (5)   |
| Other                              | 9 (2)           | 0 (0)   | 33 (23)        | 8 (24)  | 8 (4)              | 2 (5)   |

**Supplementary Table S2 (related to Table 2). Selected microbial-associated metabolites and corresponding model coefficients in LASSO regression.**

| <b>Metabolite</b>             | <b>Lasso selection</b>   |                    |
|-------------------------------|--------------------------|--------------------|
|                               | <b>Selected in model</b> | <b>Coefficient</b> |
| AcetylCadaverine              | -                        | -                  |
| 5-hydroxy-L-tryptophan        | -                        | -                  |
| 5-methoxy-3-indoleacetic acid | -                        | -                  |
| Indole-3-lactic acid          | -                        | -                  |
| Indoleacrylic acid            | Yes                      | 0.3653             |
| Glycodeoxycholate             | -                        | -                  |
| Indole-3-acetaldehyde         | -                        | -                  |
| Indole-3-ethanol              | -                        | -                  |
| Indole-derivative_2           | Yes                      | 0.5022             |
| Indole-derivative_1           | -                        | -                  |
| TMAO                          | Yes                      | 0.2412             |
| Deoxycholate                  | -                        | -                  |
| Indole-3-acetamide            | -                        | -                  |
| Indole-3-acetate              | -                        | -                  |

**Supplementary Table S3 (related to Table 2). Stability check of the LASSO regression using perturbed training data and evaluated on the Validation Set for the 3-marker microbial panel.**

|                                           | <b>Perturbations</b>        | <b>AUC (95% CI)</b> | <b>Adj OR†</b>   |
|-------------------------------------------|-----------------------------|---------------------|------------------|
| Lasso regression with 3 selected features | 2 randomly selected centers | 0.63 (0.44-0.82)    | 1.37 (0.89-2.09) |
|                                           | 2 randomly selected centers | 0.73 (0.60-0.86)    | 2.33 (1.52-3.77) |
|                                           | 2 randomly selected centers | 0.54 (0.41-0.68)    | 1.25 (0.90-1.73) |
|                                           | 2 randomly selected centers | 0.55 (0.45-0.63)    | 1.27 (0.92-1.72) |
|                                           | 3 randomly selected centers | 0.64 (0.54-0.73)    | 1.65 (1.23-2.24) |
|                                           | 300 random samples          | 0.60 (0.51-0.68)    | 1.40 (1.02-1.90) |

† Age, gender, BMI, and smoking status were included as covariates in adjusted odds ratios (ORs)

**Supplementary Table S4 (related to Table 3). Performance of the 3-marker microbial panel, the 5-marker non-microbial panel, and the combined (microbial+non-microbial) metabolite panel amongst diabetic and non-diabetic individuals in the PLCO set-aside Test Set.** † Age, gender, BMI, and smoking status were included as covariates in adjusted odds ratios (ORs); odds ratio per unit SD increase. N0: Number of non-cases, N1: Number of cases.

| 3-marker microbial panel                 |             |              |                   |         |              |              |                   |         |
|------------------------------------------|-------------|--------------|-------------------|---------|--------------|--------------|-------------------|---------|
| Diabetics                                |             |              |                   |         | Non-Diabetic |              |                   |         |
|                                          | Sample Size | AUC (95% CI) | Adj. OR (95% CI)† | P-value | Sample Size  | AUC (95% CI) | Adj. OR (95% CI)† | P-value |
| PLCO Testing Set                         | N0 = 14     | 0.62         | 0.8               | 0.77    | N0 = 210     | 0.64         | 1.84              | <0.001  |
|                                          | N1 = 4      | (0.22-1.00)  | (0.09-3.61)       |         | N1 = 33      | (0.53-0.77)  | (1.32-2.61)       |         |
| All PLCO samples                         | N0 = 55     | 0.6          | 1.56              | 0.13    | N0 = 805     | 0.62         | 1.5               | <0.001  |
|                                          | N1 = 22     | (0.46-0.74)  | (0.88-2.95)       |         | N1 = 150     | (0.57-0.67)  | (1.27-1.77)       |         |
| 5-marker non-microbial panel             |             |              |                   |         |              |              |                   |         |
| Diabetics                                |             |              |                   |         | Non-Diabetic |              |                   |         |
|                                          | Sample Size | AUC (95% CI) | Adj. OR (95% CI)† | P-value | Sample Size  | AUC (95% CI) | Adj. OR (95% CI)† | P-value |
| PLCO Testing Set                         | N0 = 14     | 0.65         | 1.93              | 0.43    | N0 = 210     | 0.75         | 2.74              | <0.001  |
|                                          | N1 = 4      | (0.27-1.00)  | (0.45-17.61)      |         | N1 = 33      | (0.65-0.84)  | (1.83-4.32)       |         |
| All PLCO samples                         | N0 = 55     | 0.67         | 2.67              | 0.004   | N0 = 805     | 0.74         | 2.95              | <0.001  |
|                                          | N1 = 22     | (0.52-0.82)  | (1.44-5.72)       |         | N1 = 150     | (0.70-0.78)  | (2.12-3.20)       |         |
| Combined (microbial+non-microbial) Panel |             |              |                   |         |              |              |                   |         |
| Diabetics                                |             |              |                   |         | Non-Diabetic |              |                   |         |
|                                          | Sample Size | AUC (95% CI) | Adj. OR (95% CI)† | P-value | Sample Size  | AUC (95% CI) | Adj. OR (95% CI)† | P-value |
| PLCO Testing Set                         | N0 = 14     | 0.65         | 1.7               | 0.52    | N0 = 210     | 0.81         | 3.39              | <0.001  |
|                                          | N1 = 4      | (0.29-1.00)  | (0.38-13.34)      |         | N1 = 33      | (0.72-0.89)  | (2.19-5.61)       |         |
| All PLCO samples                         | N0 = 55     | 0.67         | 2.71              | 0.004   | N0 = 805     | 0.76         | 2.79              | <0.001  |
|                                          | N1 = 22     | (0.53-0.81)  | (1.44-5.84)       |         | N1 = 150     | (0.72-0.80)  | (2.27-3.46)       |         |

**Supplementary Table S5 (related to Table 3). Patient and tumor characteristics for the newly-diagnosed PDAC cohort.**

| Variable                                   | PDAC Case (N=99) |     | Chronic Pancreatitis (N=50) |     | Healthy Control (N=100) |      |
|--------------------------------------------|------------------|-----|-----------------------------|-----|-------------------------|------|
|                                            | No.              | %   | No.                         | %   | No.                     | %    |
| <b>Institution</b>                         |                  |     |                             |     |                         |      |
| DF/BWCC                                    | 69               | 70% | 30                          | 60% | 94                      | 94%  |
| BIDMC                                      | 15               | 15% | 15                          | 30% | 0                       | 0%   |
| CUMC                                       | 15               | 15% | 5                           | 10% | 6                       | 6%   |
| <b>Age (year), median (IQR)</b>            | 69.8 (62.5-74.8) |     | 65.4 (54.7-72.2)            |     | 63.7 (55.7-70.6)        |      |
| <b>Gender</b>                              |                  |     |                             |     |                         |      |
| Male                                       | 51               | 52% | 33                          | 66% | 51                      | 51%  |
| Female                                     | 48               | 48% | 17                          | 34% | 49                      | 49%  |
| <b>Race</b>                                |                  |     |                             |     |                         |      |
| White                                      | 94               | 95% | 42                          | 84% | 84                      | 86%  |
| Black/African-American                     | 0                | 0%  | 5                           | 10% | 5                       | 5%   |
| Asian                                      | 1                | 1%  | 0                           | 0%  | 2                       | 2%   |
| Other                                      | 4                | 4%  | 3                           | 6%  | 7                       | 7%   |
| <b>Blood collection year</b>               |                  |     |                             |     |                         |      |
| 2015-2016                                  | 19               | 19% | 2                           | 4%  | 0                       | 0%   |
| 2017-2019                                  | 80               | 81% | 48                          | 96% | 100                     | 100% |
| <b>Smoking Status</b>                      |                  |     |                             |     |                         |      |
| Current Smoker                             | 6                | 6%  | 11                          | 22% | 4                       | 4%   |
| Past smoker                                | 50               | 51% | 17                          | 34% | 42                      | 42%  |
| Never smoker                               | 43               | 43% | 22                          | 44% | 54                      | 54%  |
| <b>BMI (kg/m<sup>2</sup>), Meidan(IQR)</b> | 27.4 (24.0-30.0) |     | 25.0 (22.8-27.6)            |     | 27.5 (24.3-32.0)        |      |
| <b>Diabetes</b>                            |                  |     |                             |     |                         |      |
| No                                         | 64               | 65% | 23                          | 46% | 93                      | 93%  |
| Yes                                        | 35               | 35% | 27                          | 54% | 7                       | 7%   |
| <b>Etiology of chronic pancreatitis</b>    |                  |     |                             |     |                         |      |



|                                                              |    |     |    |     |   |   |
|--------------------------------------------------------------|----|-----|----|-----|---|---|
| Alcohol                                                      | -  | -   | 16 | 32% | - | - |
| Autoimmune                                                   | -  | -   | 2  | 4%  | - | - |
| Congenital anatomical variant                                | -  | -   | 3  | 6%  | - | - |
| Duct stricture or stones                                     | -  | -   | 7  | 14% | - | - |
| Idiopathic                                                   | -  | -   | 21 | 42% | - | - |
| Other                                                        | -  | -   | 1  | 2%  | - | - |
| <b>AJCC 8<sup>th</sup> edition staging pTNM<sup>a</sup></b>  |    |     |    |     |   |   |
| T0-2N0M0                                                     | 15 | 24% | -  | -   | - | - |
| T3-4N0M0                                                     | 2  | 3%  | -  | -   | - | - |
| T1-4N1M0                                                     | 28 | 45% | -  | -   | - | - |
| T1-4N2M0                                                     | 17 | 28% | -  | -   | - | - |
| <b>AJCC 8<sup>th</sup> edition staging ypTNM<sup>b</sup></b> |    |     |    |     |   |   |
| T0-2N0M0                                                     | 24 | 64% | -  | -   | - | - |
| T3-4N0M0                                                     | 1  | 3%  | -  | -   | - | - |
| T1-4N1M0                                                     | 7  | 19% | -  | -   | - | - |
| T1-4N2M0                                                     | 5  | 14% | -  | -   | - | - |
| <b>PDAC recurrence</b>                                       |    |     |    |     |   |   |
| No <sup>c</sup>                                              | 56 | 57% | -  | -   | - | - |
| Yes                                                          | 43 | 43% | -  | -   | - | - |

DF/BWCC: Dana-Farber/Brigham and Women's Cancer Center; BIDMC: Beth Israel Deaconess Medical Center; CUMC: Columbia University Medical Center  
AJCC: American Joint Committee on Cancer, PDAC: Pancreatic ductal adenocarcinoma, BMI: Body mass index

<sup>a</sup>Patients who underwent up-front surgical resection

<sup>b</sup>Patients who received neoadjuvant treatment and then underwent surgical resection

<sup>c</sup>The median (IQR) follow-up time was 15.0 (7.2-23.2) months for patients without cancer recurrence

**Supplementary Table S6 (related to Figure 2). Performance of all non-microbial metabolites in the PLCO Training and Validation Sets.**

*See excel file.*

Supplementary Table S7 (related to Table 3). Selected non-microbial metabolites.

| Name                           | Training - 5 centers |                         | Validation- 2 centers |                  |
|--------------------------------|----------------------|-------------------------|-----------------------|------------------|
|                                | Adj. Odds Ratio†     | <i>P</i> -value (FDR) ‡ | Adj. Odds Ratio†      | <i>P</i> -value£ |
| <b>Cholesterol glucuronide</b> | 1.735                | <0.001                  | 1.720                 | 0.006            |
| <b>Galactosamine</b>           | 1.749                | <0.001                  | 1.514                 | 0.035            |
| <b>2-Hydroxyglutarate</b>      | 1.857                | <0.001                  | 1.738                 | 0.006            |
| <b>Erythritol</b>              | 1.688                | <0.001                  | 1.532                 | 0.030            |
| <b>Glucose</b>                 | 1.744                | <0.001                  | 1.662                 | 0.018            |

† Age, gender, BMI, and smoking status were included as covariates in adjusted odds ratios (ORs); odds ratio per unit SD increase

‡ Benjamini and Hochberg adjusted p-values

£ Raw p-values

**Supplementary Table S8 (related to Table 3). Performance of different learning models based on non-microbial metabolites and model stability check in the PLCO Validation Set.** † Age, gender, BMI, and smoking status were included as covariates in adjusted odds ratios (ORs); odds ratio per unit SD increase.

| Model                                              | Hyperparameters                                                                     | AUC (95% CI)     | Adj OR†          |
|----------------------------------------------------|-------------------------------------------------------------------------------------|------------------|------------------|
| Logistic regression                                | -                                                                                   | 0.72 (0.63-0.81) | 2.10 (1.04-2.90) |
| logistic regression with ridge (L2) regularization | Penalty weight = 0.18                                                               | 0.69 (0.58-0.78) | 1.74 (1.20-2.25) |
| logistic regression with LASSO (L1)                | Penalty weight = 0.01, number of selected features = 4                              | 0.71 (0.54-0.73) | 2.08 (0.94-2.83) |
| Iterative Random Forest                            | Number of iterations = 3                                                            | 0.60 (0.49-0.72) | 1.44 (0.90-1.90) |
| Deep neural network model                          | Number of cross-validation folds = 6, hidden layers = 3 with 32 nodes in each layer | 0.59 (0.48-0.68) | 1.43 (0.95-2.10) |
| GBM                                                | Number of trees = 42, max depth= 5                                                  | 0.58 (0.46-0.67) | 1.30 (0.93-1.87) |
| Auto ML                                            | Selected model = randomized trees                                                   | 0.66 (0.52-0.72) | 1.85 (1.50-2.02) |

|                                              | Perturbations               | AUC (95% CI)     | Adj OR†          |
|----------------------------------------------|-----------------------------|------------------|------------------|
| Logistic regression with 5 selected features | 2 randomly selected centers | 0.71 (0.52-0.87) | 2.10 (1.10-2.94) |
|                                              | 2 randomly selected centers | 0.74 (0.61-0.91) | 2.33 (1.42-4.10) |
|                                              | 2 randomly selected centers | 0.69 (0.59-0.80) | 2.11 (0.90-2.73) |
|                                              | 2 randomly selected centers | 0.67 (0.45-0.85) | 1.90 (1.12-2.72) |
|                                              | 3 randomly selected centers | 0.60 (0.52-0.68) | 1.65 (1.23-2.24) |
|                                              | 300 random samples          | 0.64 (0.55-0.71) | 1.73 (1.52-2.20) |

**Supplementary Table S9 (related to Table 3). Performance of the 5-marker non-microbial panel in the PLCO set-aside Test Set and the entire specimen set.**

| Set-aside Test Set                            |                      |                                           |                       |                |
|-----------------------------------------------|----------------------|-------------------------------------------|-----------------------|----------------|
|                                               |                      | 5-marker non-microbial panel <sup>a</sup> |                       |                |
| Time to Dx                                    | Sample Size          | AUC.<br>(95% CI)                          | Adj. OR †<br>(95% CI) | <i>P-value</i> |
| [0-5)                                         | N0 = 225<br>N1 = 37  | 0.74<br>(0.65 - 0.83)                     | 2.72<br>(1.83 - 4.24) | <0.001         |
| [0-2)                                         | N0 = 225<br>N1 = 24  | 0.82<br>(0.72 - 0.92)                     | 4.03<br>(2.41 - 7.32) | <0.001         |
| [2-5)                                         | N0 = 225<br>N1 = 13  | 0.59<br>(0.44 - 0.72)                     | 1.32<br>(0.71 - 2.41) | 0.36           |
| Entire Set (Development + Set-aside Test Set) |                      |                                           |                       |                |
|                                               |                      | 5-marker non-microbial panel <sup>a</sup> |                       |                |
| Time to Dx                                    | Sample Size          | AUC.<br>(95% CI)                          | Adj. OR †<br>(95% CI) | <i>P-value</i> |
| [0-5)                                         | N0 = 861<br>N1 = 172 | 0.74<br>(0.67 - 0.77)                     | 2.59<br>(2.13 - 3.18) | <0.001         |
| [0-2)                                         | N0 = 861<br>N1 = 92  | 0.80<br>(0.75 - 0.85)                     | 3.69<br>(2.83 - 4.91) | <0.001         |
| [2-5)                                         | N0 = 861<br>N1 = 80  | 0.65<br>(0.59 - 0.72)                     | 1.74<br>(1.37 - 2.21) | <0.001         |

† Age, gender, BMI, and smoking status were included as covariates in adjusted odds ratios (ORs); odds ratio per unit SD increase

N0: number of non-cases

N1: number of cases

a: Non-microbial-related metabolite signature includes cholesterol glucuronide, hydroxyglutarate, galactosamine, glucose, and erythritol

**Supplementary Table S10 (related to Figure 2 and Table 4). Performance of the combined metabolite panel plus CA19-9 stratified by diabetic status.**

| 5-marker non-microbial panel + 3-marker microbial panel + CA19.9 | Diabetics          |                     |                       |         | Non-Diabetic         |                     |                       |         |
|------------------------------------------------------------------|--------------------|---------------------|-----------------------|---------|----------------------|---------------------|-----------------------|---------|
|                                                                  | Sample Size        | AUC (95% CI)        | Adj. OR (95% CI) †    | P-value | Sample Size          | AUC (95% CI)        | Adj. OR (95% CI)†     | P-value |
| <b>PLCO Testing Set</b>                                          | N0 = 14<br>N1 = 4  | 0.78<br>(0.50-1.00) | 6.82<br>(1.14-210.61) | 0.10    | N0 = 210<br>N1 = 33  | 0.84<br>(0.76-0.92) | 10.21<br>(4.55-26.61) | <0.001  |
| <b>All PLCO samples</b>                                          | N0 = 55<br>N1 = 22 | 0.71<br>(0.60-0.84) | 3.75<br>(1.81-9.72)   | 0.001   | N0 = 805<br>N1 = 150 | 0.80<br>(0.76-0.84) | 9.54<br>(6.36-14.75)  | <0.001  |

† Age, gender, BMI, and smoking status were included as covariates in adjusted odds ratios (ORs); odds ratio per unit SD increase  
 N0: number of non-cases  
 N1: number of cases

**Supplementary Figure S1 (related to Figure 1 and Table 2). Distribution plots for detected microbial-related metabolites across analytical batches in the PLCO specimen set. X-axis represents individual specimens.**

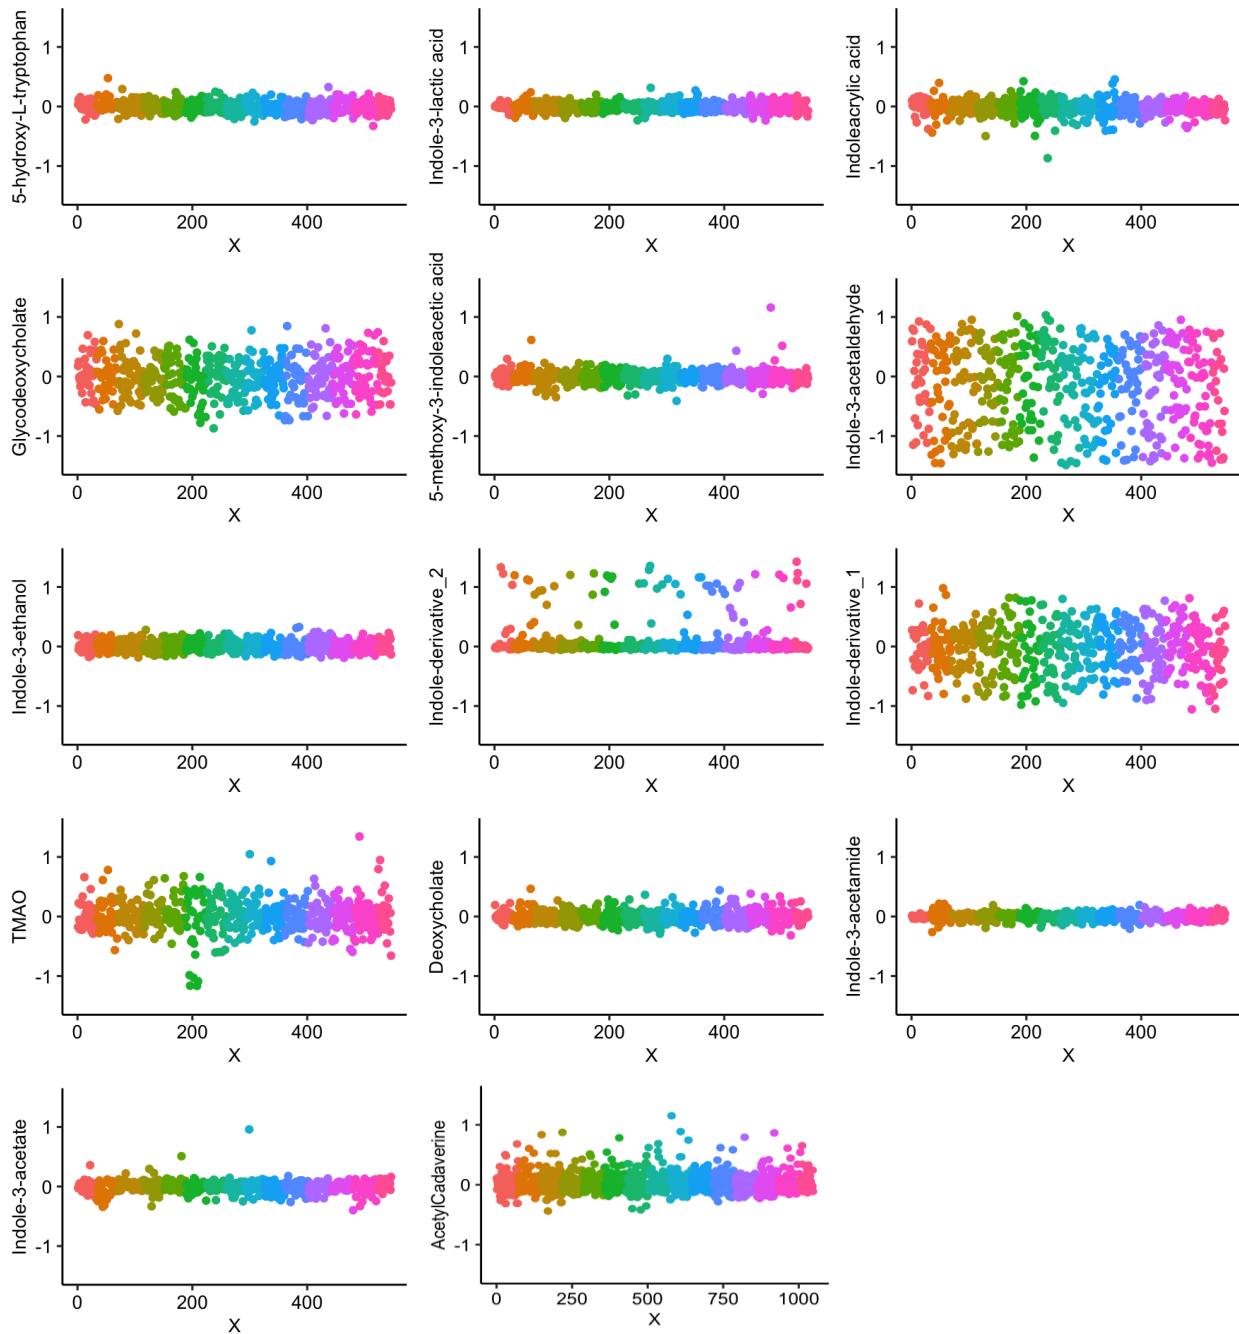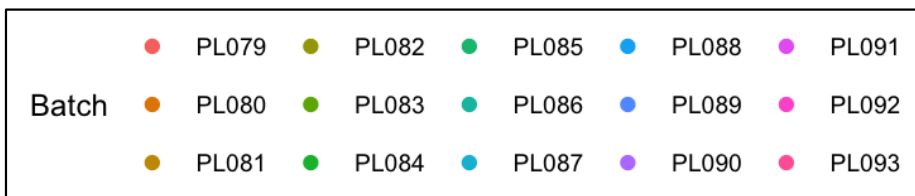

**Supplementary Figure S2 (related to Figure 1 and Table 2). Odds ratios, adjusted odds ratios, and correlations for individual microbial-related metabolites for risk of pancreatic cancer in the Training Set.** Gender, age, smoking status, and BMI were included as covariates in adjusted odds ratios.

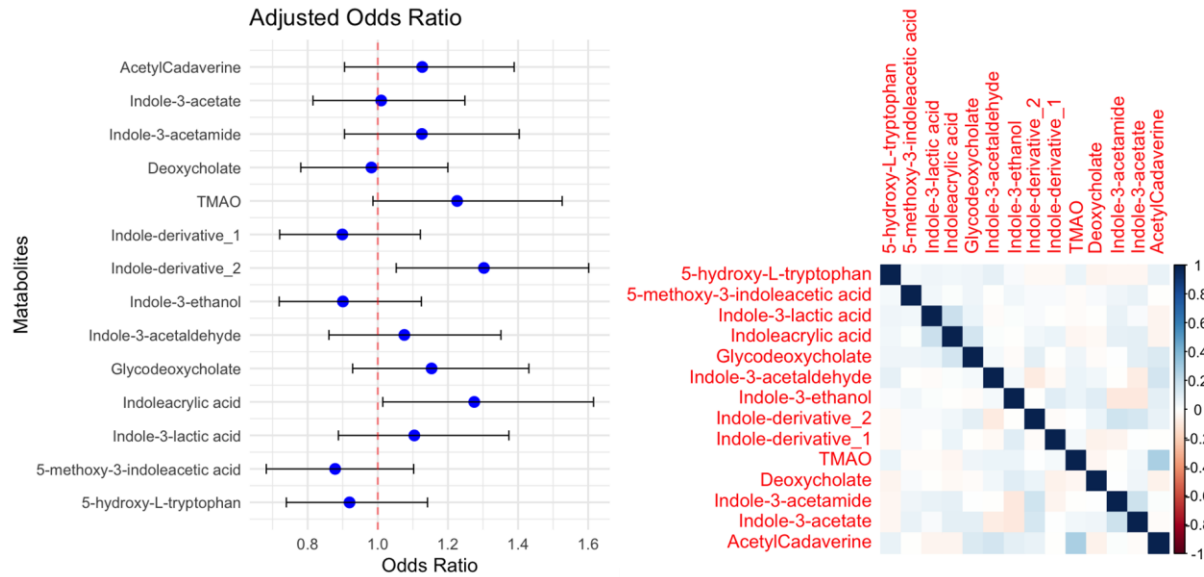



**Supplementary Figure S3 (related to Table 2). Workflow of analyses.**

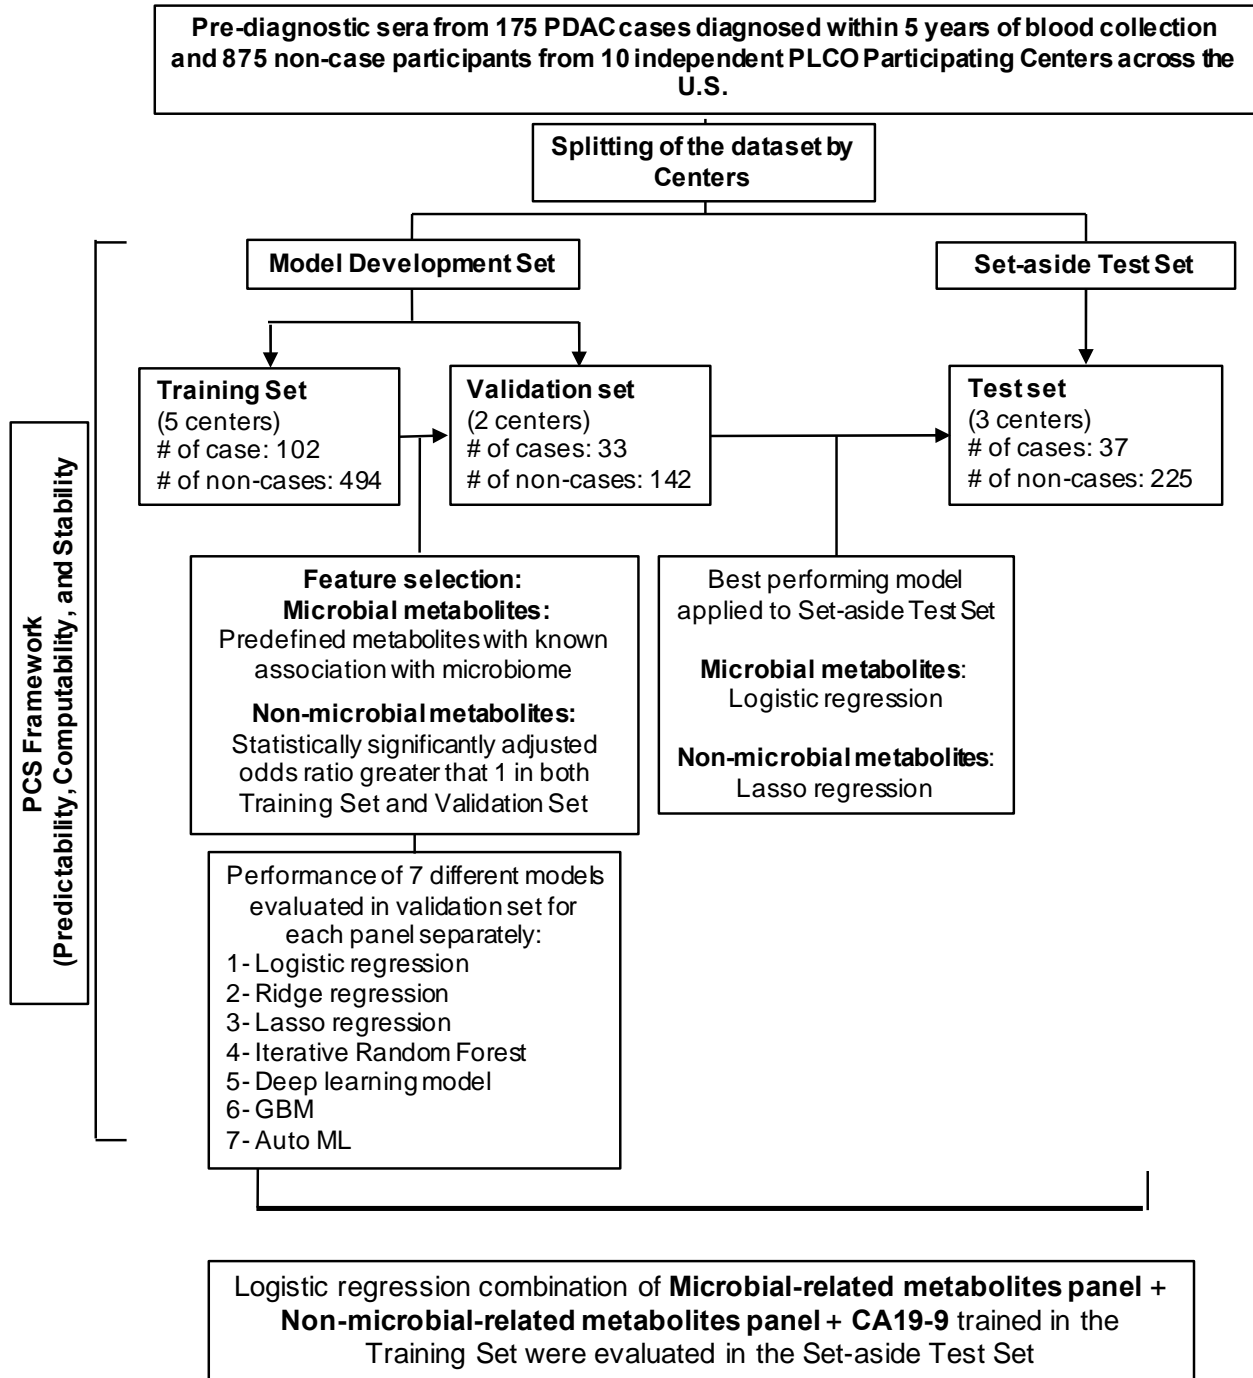

**Supplementary Figure S4 (related to Table 3). Predictive performance of the 3-marker microbial panel in the independent newly-diagnosed PDAC cohort.**

**Abbreviation:** CP- chronic pancreatitis. A subset samples were excluded due to insufficient sample volume or not having passed quality control criteria.

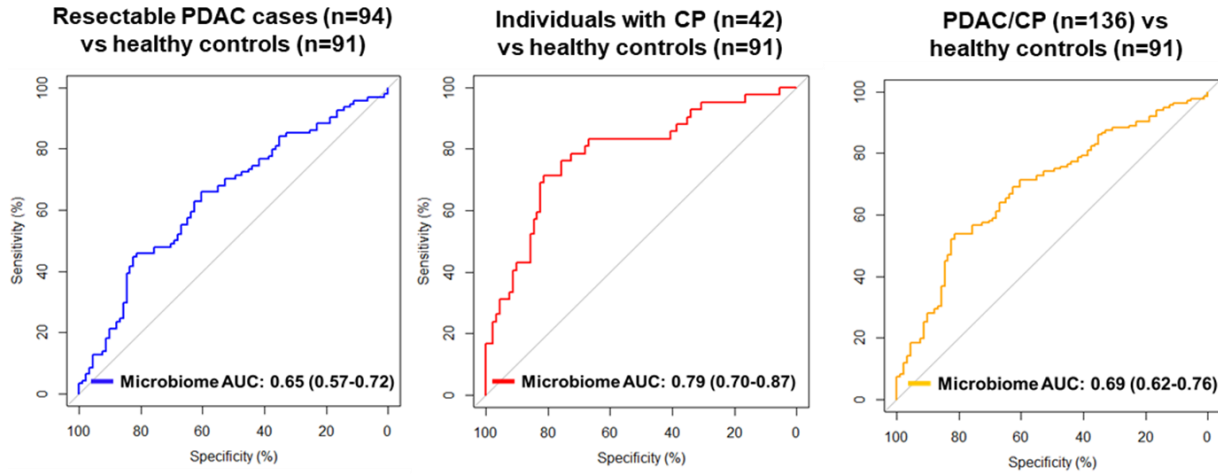

| Odds Ratio (95% CI)                       |                                         |                             |
|-------------------------------------------|-----------------------------------------|-----------------------------|
| Resectable PDAC cases vs healthy controls | Individuals with CP vs healthy controls | PDAC/CP vs healthy controls |
| 1.55 (1.13-2.23)                          | 2.83 (1.83-4.82)                        | 2.07 (1.45-3.18)            |
